# Supplementary material for: Urea-assisted cooperative assembly of phosphorus dendrimer–zinc oxide hybrid nanostructures
Source: Royal Society of Chemistry journal article supplement (doi:10.1039/c8nj05705b), 2019-01-01

## Urea-assisted Cooperative Assembly of Phosphorus Dendrimer-Zinc Oxide Hybrid Nanostructures

Samir El Hankari,<sup>a</sup> Nadia Katir,<sup>a</sup> Vincent Collière,<sup>b</sup> Yannick Coppel,<sup>b</sup> Mosto Bousmina,<sup>a</sup> Jean Pierre Majoral,<sup>b</sup> and Abdelkrim El Kadib.<sup>a,\*</sup>

<sup>[a]</sup> Euromed Research Center, Engineering Division, Euro-Med University of Fes (UEMF), Route de Meknes, Rond-point de Bensouda, 30070, Fès, Morocco. E-mail: [a.elkadib@ueuromed.org](mailto:a.elkadib@ueuromed.org)

<sup>[b]</sup> Laboratoire de Chimie de Coordination (LCC), CNRS, 205 route de Narbonne, 31077 Toulouse, France.

**Table S1. Various information related to the experiment protocols and also the yield of each samples obtained.**

**S1. DRIFT spectra of DG<sub>2</sub>@ZnO**

**S2. <sup>13</sup>C CP MAS NMR of DG<sub>2</sub>@ZnO**

**S3. SEM analysis of DG<sub>2</sub>@ZnO**

**S4. HRTEM analysis of DG<sub>2</sub>@ZnO**

**S5. EDX analysis of DG<sub>2</sub>@ZnO**

**Table S2. Various information related to the experiment protocols and also the yield of each samples obtained in presence of urea.**

**S6. DRIFT spectra of DG<sub>2</sub><sup>-Urea</sup>@ZnO**

**S7. <sup>31</sup>P and <sup>13</sup>C CP MAS NMR of DG<sub>2</sub><sup>-Urea</sup>@ZnO**

**S8. SEM analysis of DG<sub>2</sub><sup>-Urea</sup>@ZnO**

**S9. HRTEM analysis of DG<sub>2</sub><sup>-Urea</sup>@ZnO**

**S10. XRD analysis of DG<sub>2</sub>@ZnO and DG<sub>2</sub><sup>-Urea</sup>@ZnO**

**S11. EDX analysis of DG<sub>2</sub><sup>-Urea</sup>@ZnO**

**S12. Nitrogen sorption analysis of DG<sub>2</sub><sup>-Urea</sup>@ZnO**

**Table S1**

| <b>Samples</b>                          | <b>DG<sub>2</sub></b>                      | <b>Zinc precursors</b>   | <b>Solvent</b>                      | <b>Comment</b>                                                                                                                         | <b>Weight</b> |
|-----------------------------------------|--------------------------------------------|--------------------------|-------------------------------------|----------------------------------------------------------------------------------------------------------------------------------------|---------------|
| <b>DG<sub>2</sub><sup>PO3</sup>@ZnO</b> | DG <sub>2</sub> <sup>PO3</sup><br>(30 mg)  | Zinc acetate<br>(1.29 g) | H <sub>2</sub> O/EtOH<br>(8ml/10mL) | The transparent solution turned immediately cloudy after adding zinc forming white solid. The mixture was heated at 60°C for 48 hours. | 47 mg         |
| <b>D<sub>2</sub>G<sup>PO3</sup>@ZnO</b> | DG <sub>2</sub> <sup>PO3</sup><br>(30 mg)  | Zinc acetate<br>(1.29 g) | H <sub>2</sub> O<br>(10mL)          | The transparent solution turned immediately cloudy after adding zinc forming white solid. The mixture was heated at 60°C for 48 hours  | 23 mg         |
| <b>DG<sub>2</sub><sup>cat</sup>@ZnO</b> | DG <sub>2</sub> <sup>cat</sup><br>(30 mg)  | Zinc acetate<br>(0.29 g) | H <sub>2</sub> O/THF<br>(4ml/13mL)  | The solid is obtained after reflux (48 hours)                                                                                          | 30 mg         |
| -                                       | DG <sub>2</sub> <sup>NEt2</sup><br>(30 mg) | Zinc acetate<br>(0.70 g) | H <sub>2</sub> O<br>(8mL)           | The solution remains transparent after reflux (48 hours)                                                                               | 0 mg          |
| -                                       | DG <sub>2</sub> <sup>acac</sup><br>(30 mg) | Zinc acetate<br>(0.60 g) | H <sub>2</sub> O/THF<br>(4ml/10mL)  | The solution remains transparent after reflux (48 hours)                                                                               | 0 mg          |

# S1. DRIFT spectra of DG<sub>2</sub>@ZnO

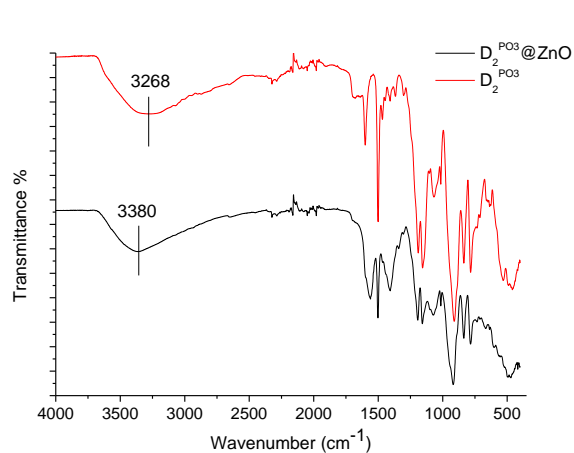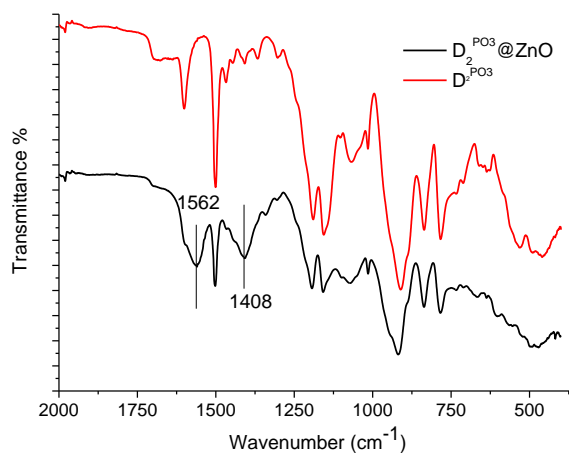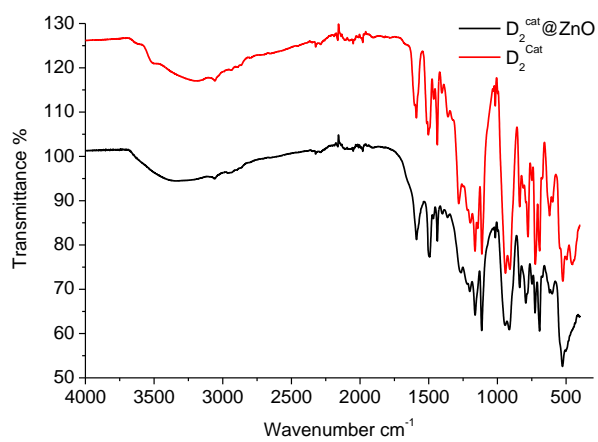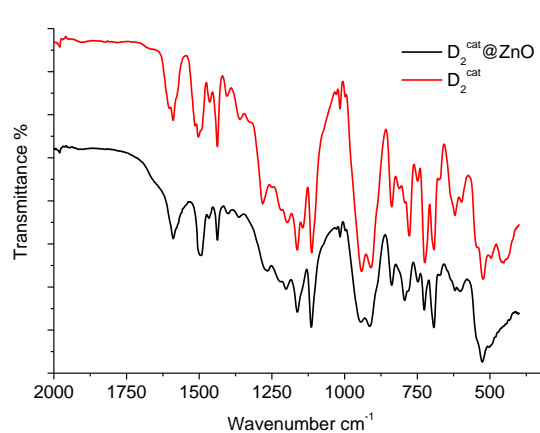

## S2. $^{13}\text{C}$ CP MAS NMR of $\text{DG}_2@\text{ZnO}$

$\text{D}_2^{\text{PO}_3}@\text{ZnO}$

— 179.68 — 150.28 — 136.18 — 131.19 — 121.54 — 72.21 — 32.84 — 24.08

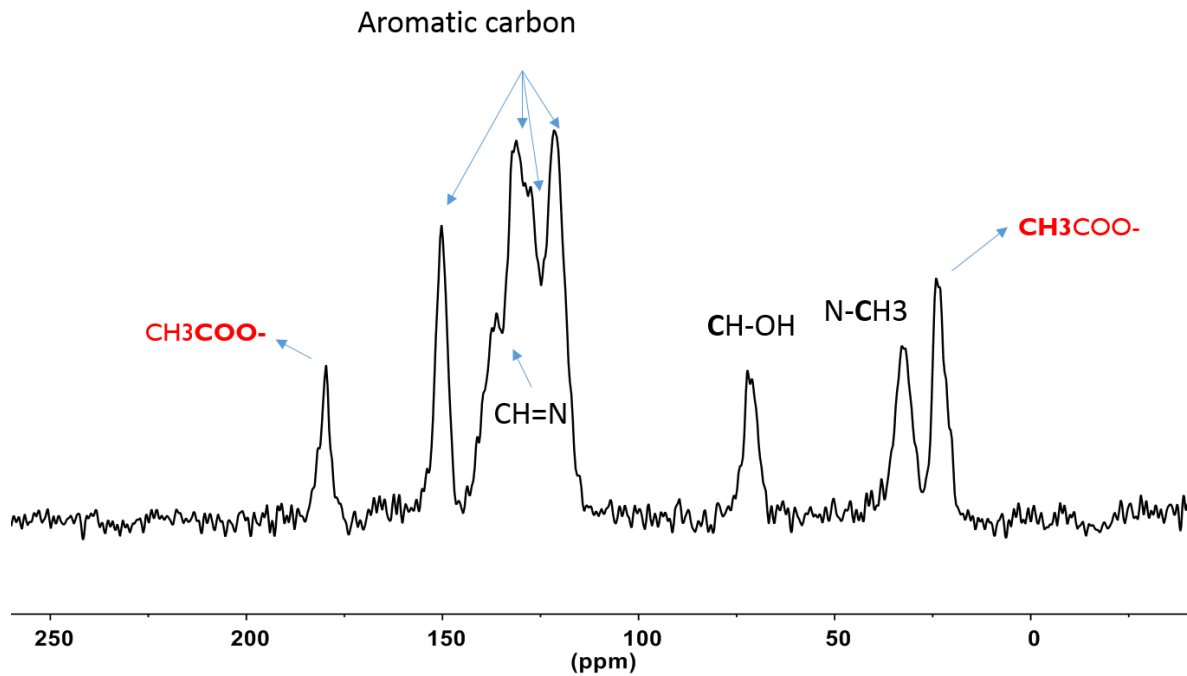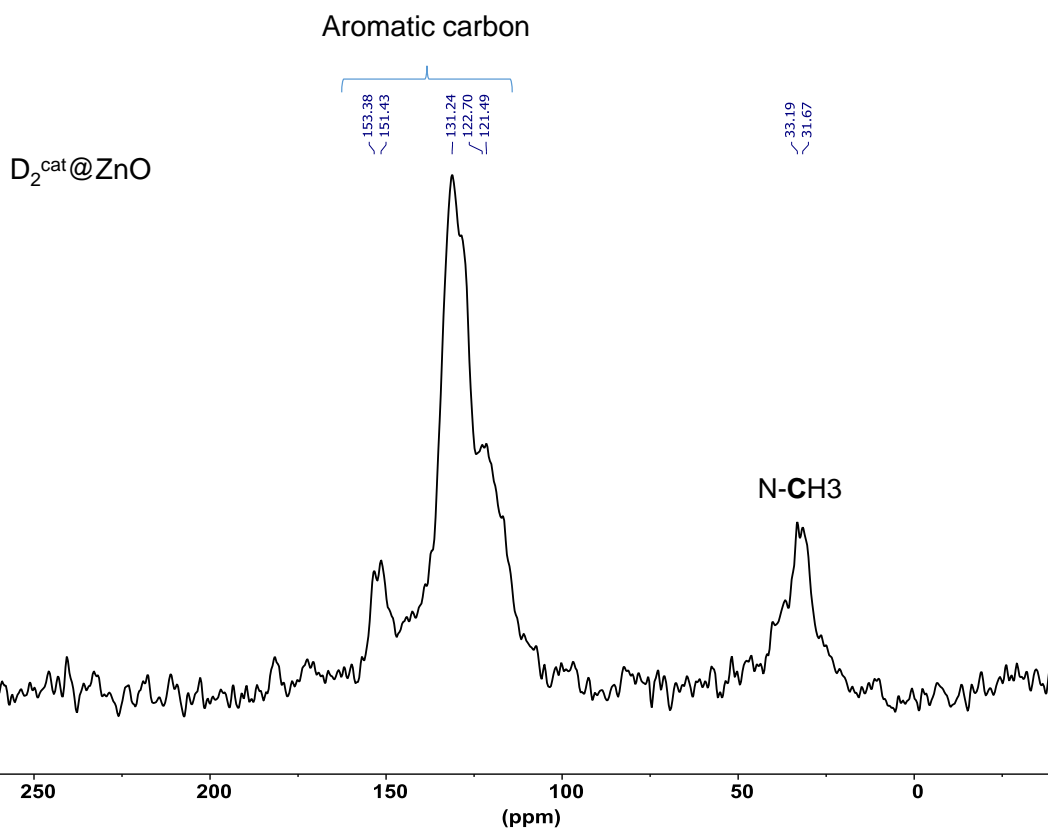

### S3. SEM analysis of DG<sub>2</sub>@ZnO

SEM analysis of DG<sub>2</sub><sup>PO3</sup>@ZnO:

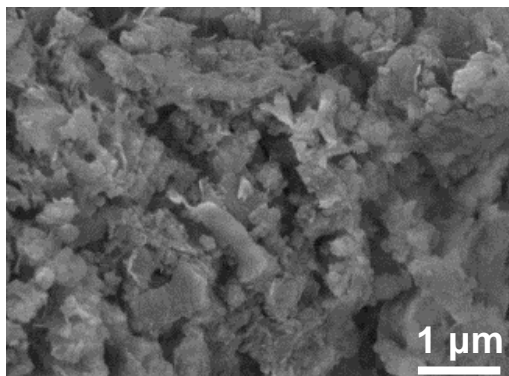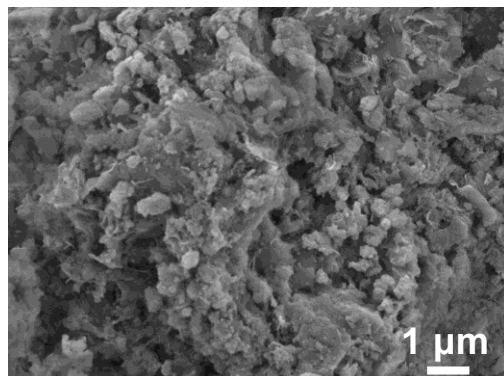

SEM analysis of DG<sub>2</sub><sup>cat</sup>@ZnO:

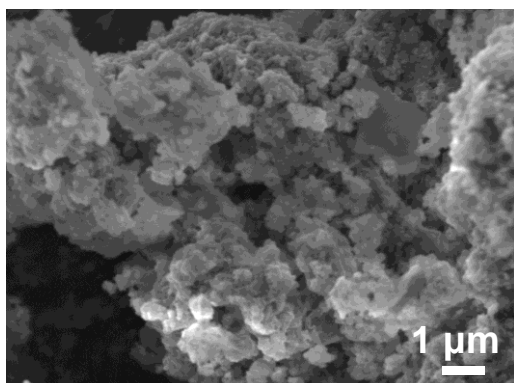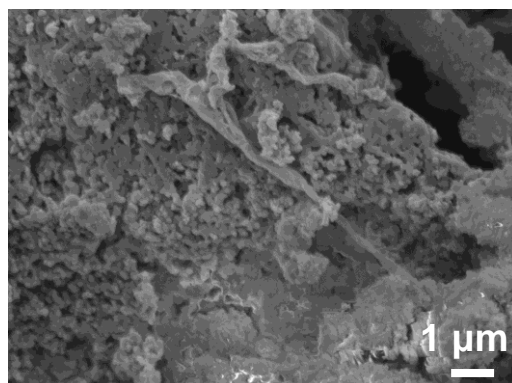

#### S4. HRTEM analysis of $DG_2@ZnO$

##### HRTEM analysis of $DG_2^{PO_3}@ZnO$

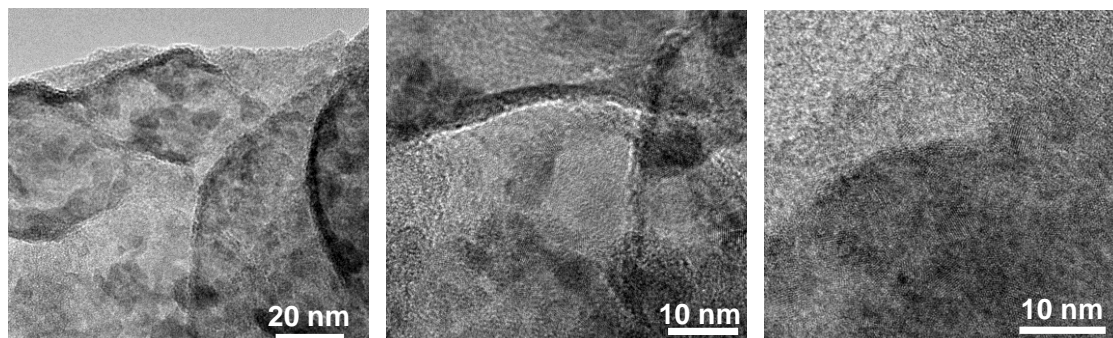

##### HRTEM analysis of $DG_2^{cat}@ZnO$

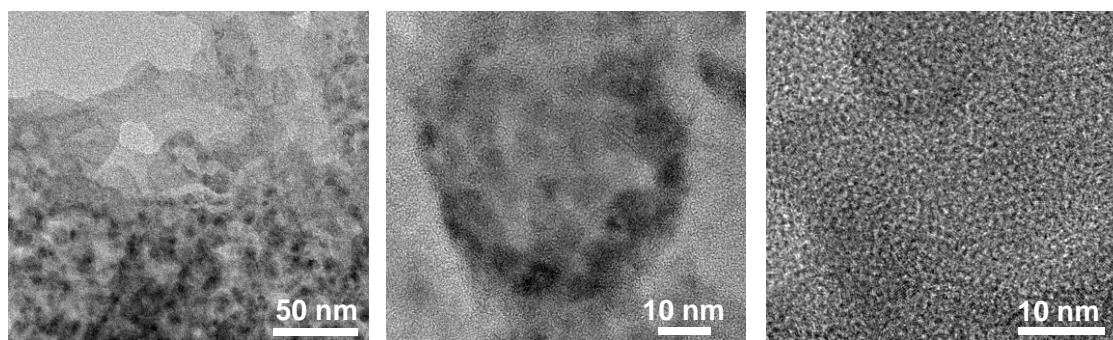

S5. EDX analysis of DG<sub>2</sub>@ZnO

EDX analysis of DG<sub>2</sub><sup>PO3</sup>@ZnO

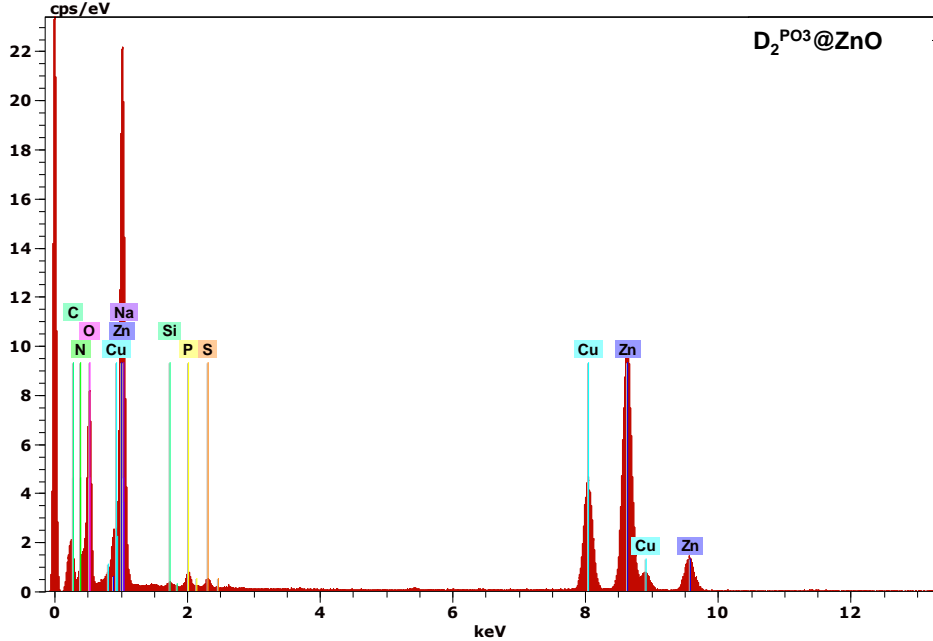

EDX analysis of DG<sub>2</sub><sup>cat</sup>@ZnO

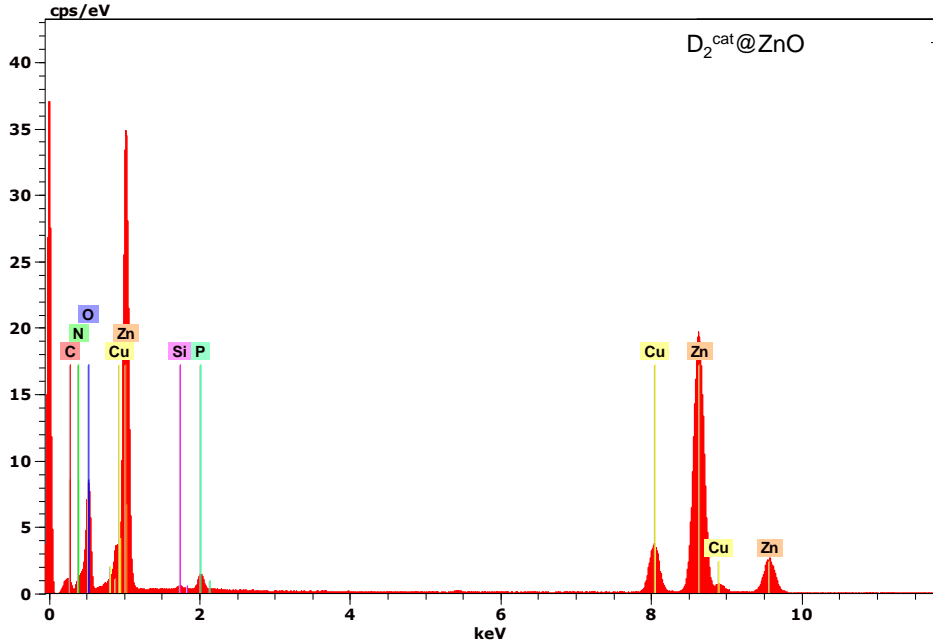

**Table S2. Various information related to the experiment protocols and also the yield of each samples obtained in presence of urea.**

| Samples                                      | DG2                                     | Zinc precursors              | Solvent                                        | Comment                                                                                                                               | Weight |
|----------------------------------------------|-----------------------------------------|------------------------------|------------------------------------------------|---------------------------------------------------------------------------------------------------------------------------------------|--------|
| $\text{DG}_2^{\text{PO}_3\text{-Urea}}@ZnO$  | $\text{DG}_2^{\text{PO}_3}$<br>(30 mg)  | Zinc acetate<br>(1.29 g)     | $\text{H}_2\text{O}/\text{EtOH}$<br>(8ml/10mL) | The transparent solution turned immediately cloudy after adding zinc forming white solid. The mixture was heated at 60°C for 48 hours | 83 mg  |
| $\text{DG}_2^{\text{cat-Urea}}@ZnO$          | $\text{DG}_2^{\text{cat}}$<br>(15 mg)   | $\text{ZnCl}_2$<br>(0.10 g)  | $\text{H}_2\text{O}/\text{THF}$<br>(1ml/4mL)   | The solid is formed after reflux (48 hours)                                                                                           | 62 mg  |
| $\text{DG}_2^{\text{NEt}_2\text{-Urea}}@ZnO$ | $\text{DG}_2^{\text{NEt}_2}$<br>(30 mg) | Zinc acetate<br>(0.70 mg)    | $\text{H}_2\text{O}$<br>(4mL)                  | The solid is formed after reflux (48 hours)                                                                                           | 29 mg  |
| $\text{DG}_2^{\text{acac-Urea}}@ZnO$         | $\text{DG}_2^{\text{acac}}$<br>(30 mg)  | $\text{ZnCl}_2$<br>(0.20 mg) | $\text{H}_2\text{O}/\text{THF}$<br>(8ml/2mL)   | The solid is formed after reflux (48 hours)                                                                                           | 35mg   |
| $\text{Urea}@ZnO-$                           | -                                       | $\text{ZnCl}_2$<br>(1.49 mg) | $\text{H}_2\text{O}/\text{THF}$<br>(8ml/2mL)   | The solid is formed after reflux (48 hours)                                                                                           | 80mg   |



## S6. DRIFT spectra of $DG_2^{-Urea}@ZnO$

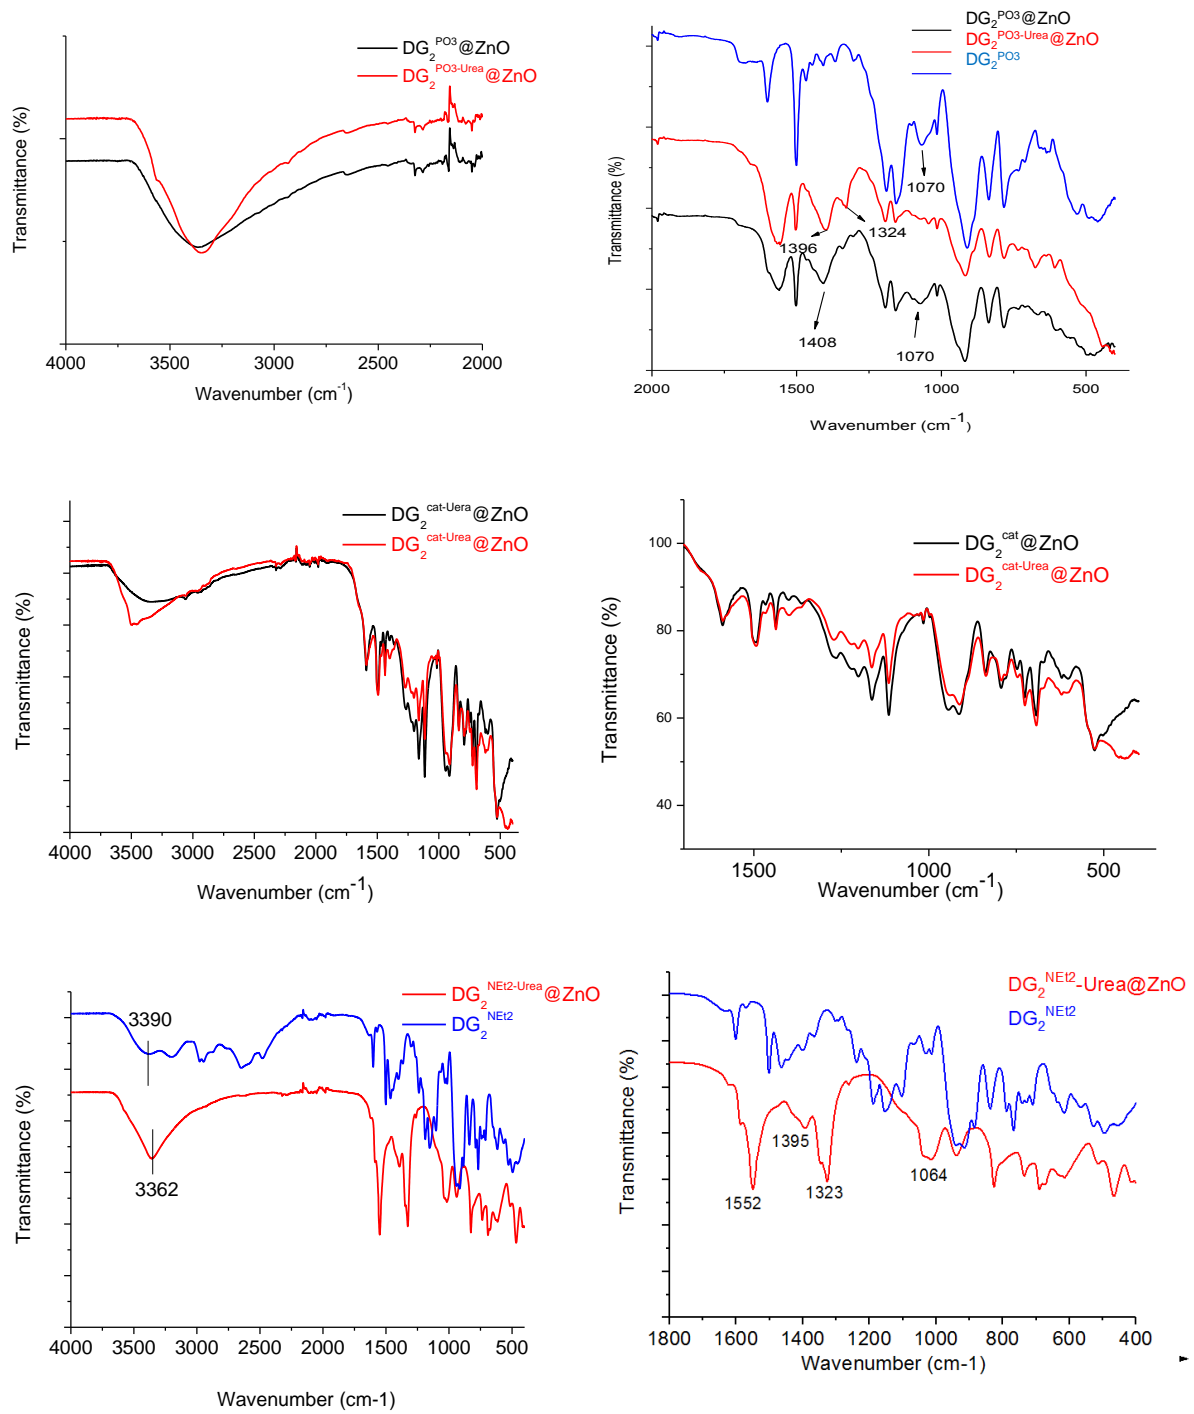

# S7. $^{31}\text{P}$ and $^{13}\text{C}$ CP MAS NMR of $\text{DG}_2\text{-Urea@ZnO}$

## $^{31}\text{P}$ CP MAS NMR of $\text{DG}_2\text{-Urea@ZnO}$

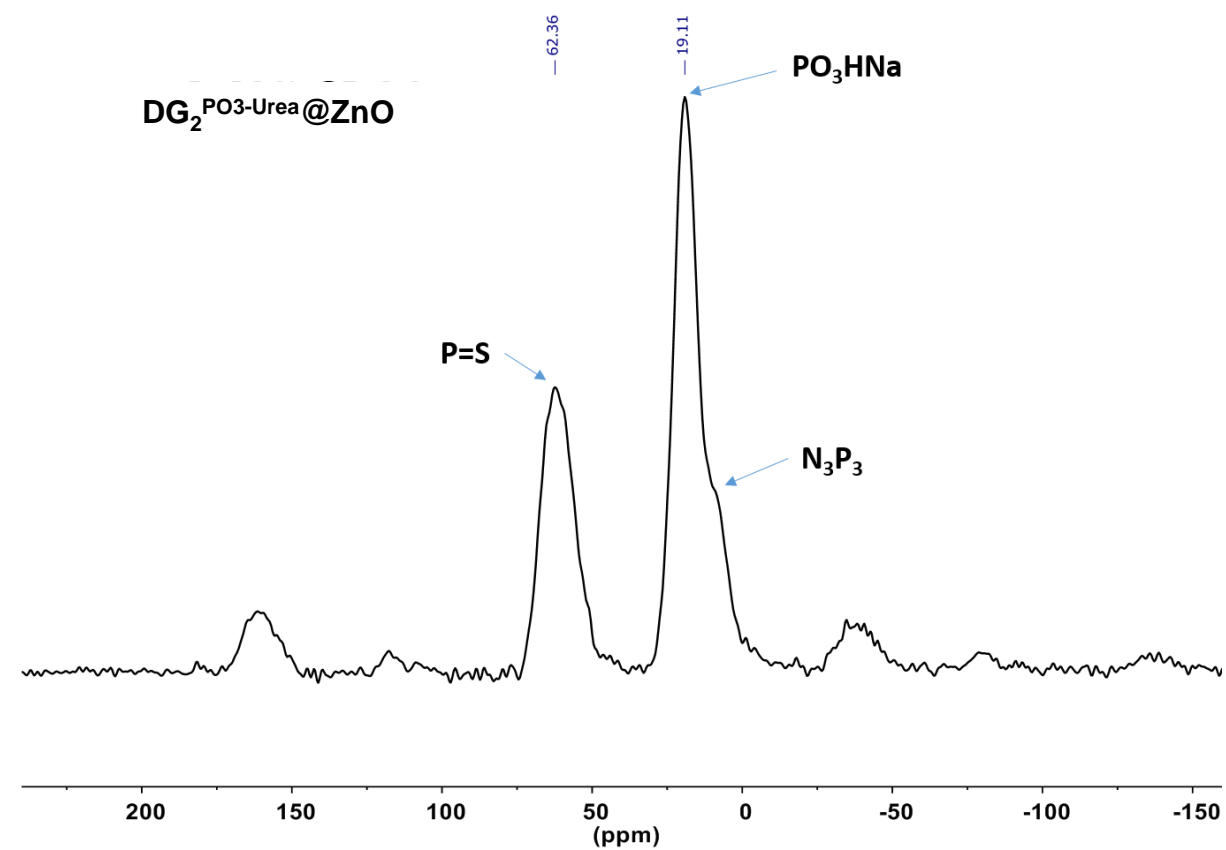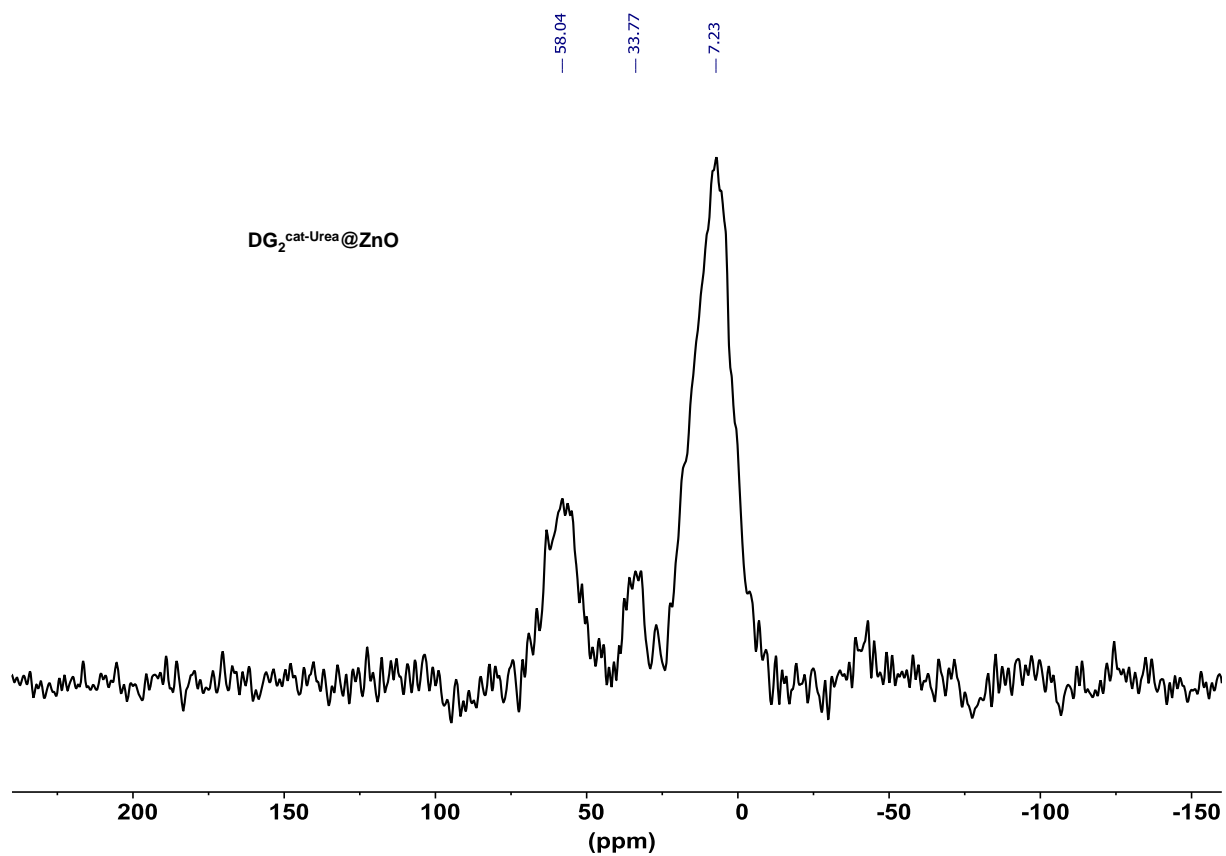

DG<sub>2</sub>acac-Urea@ZnO

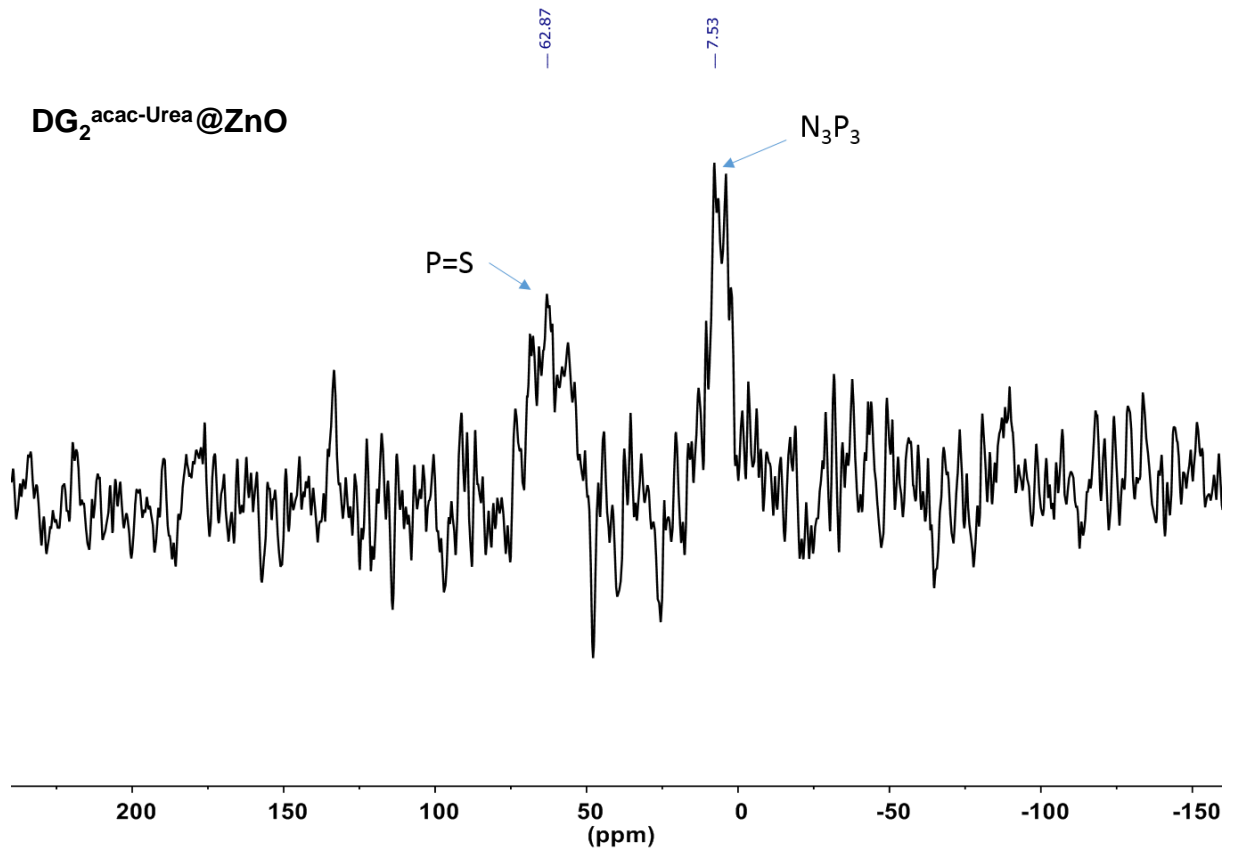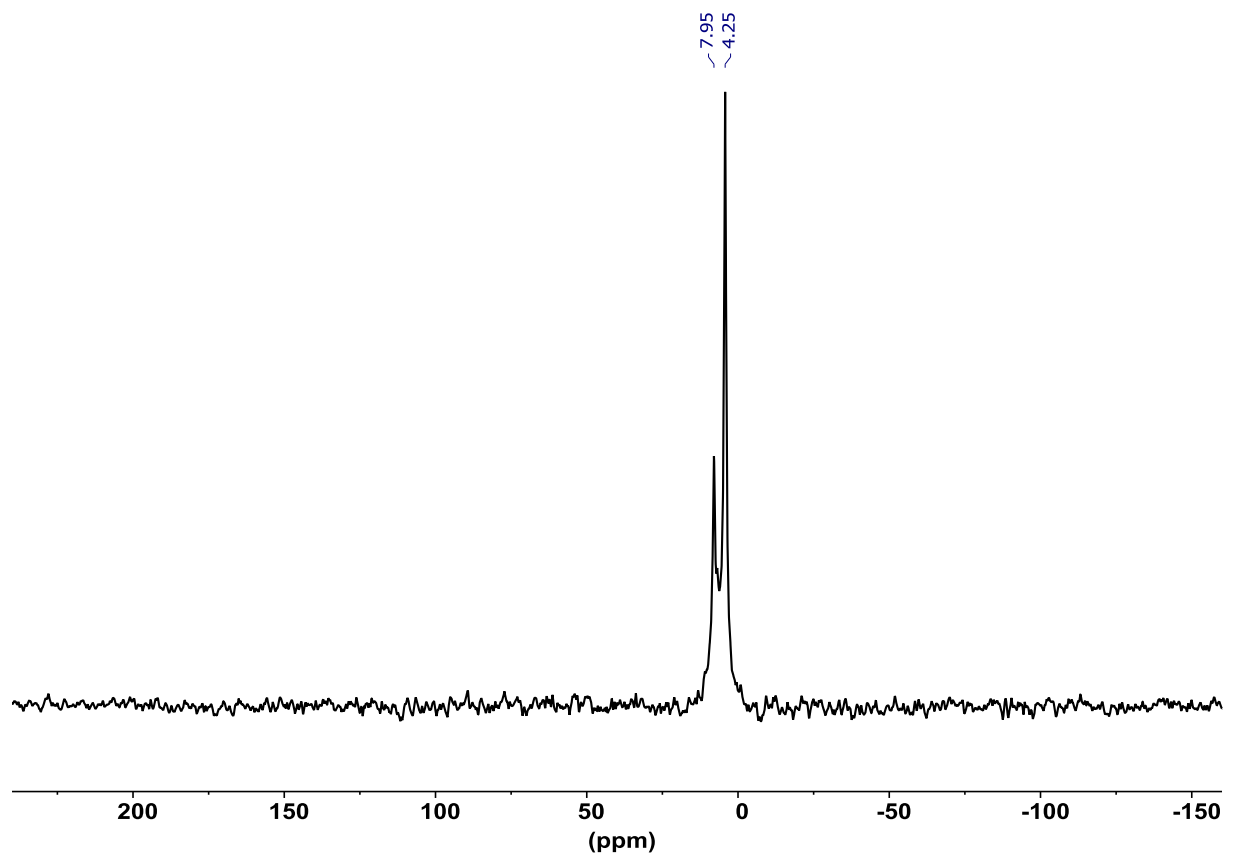

<sup>13</sup>C CP MAS NMR of DG<sub>2</sub>-Urea@ZnO

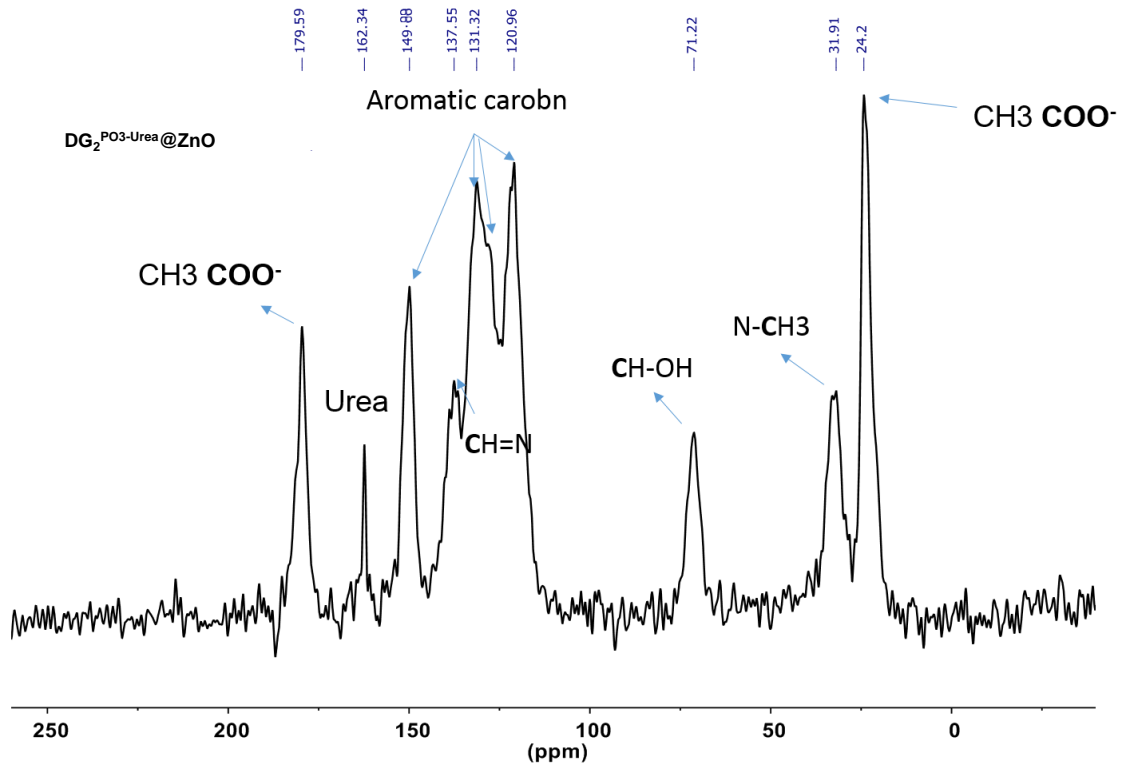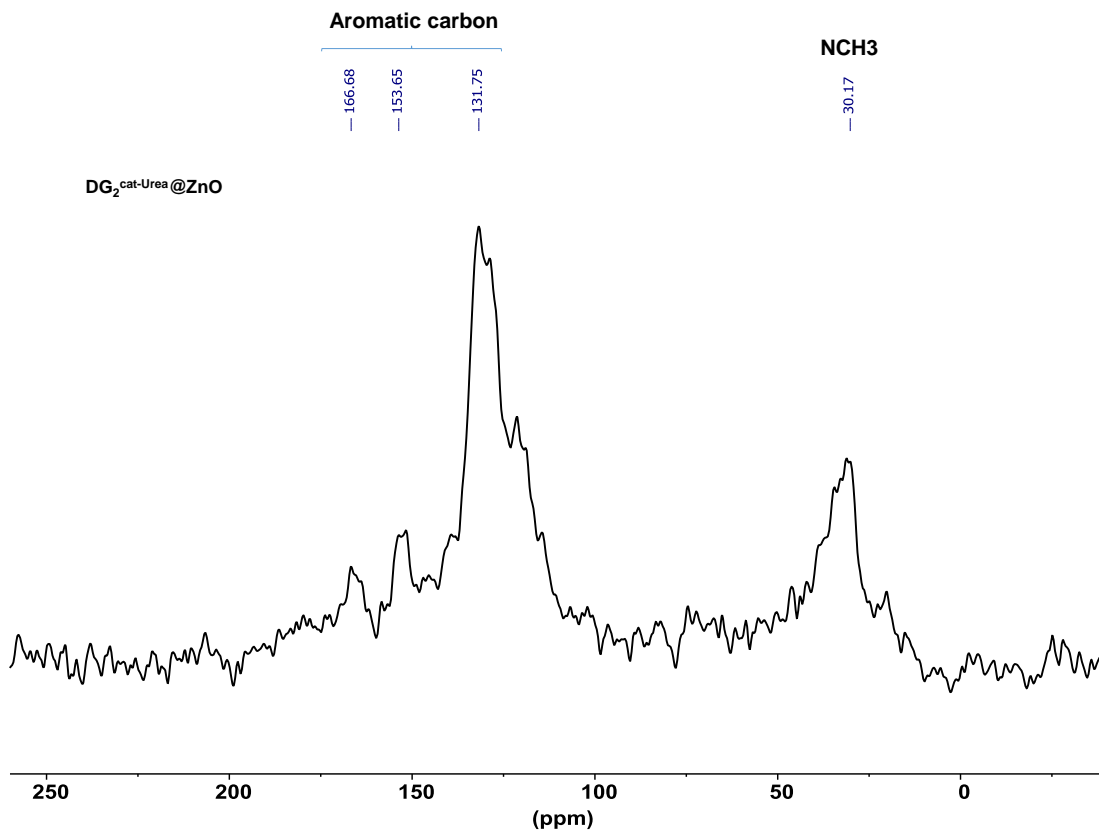

### Aromatic carbon

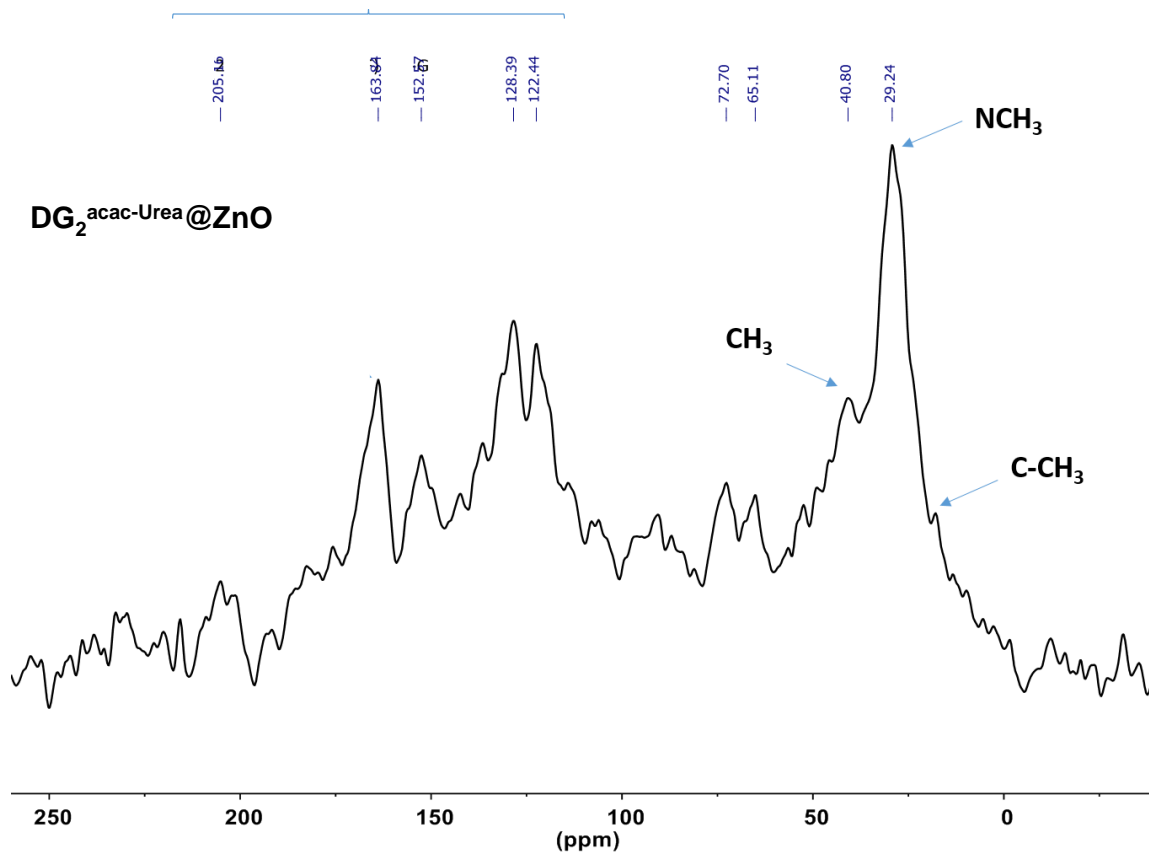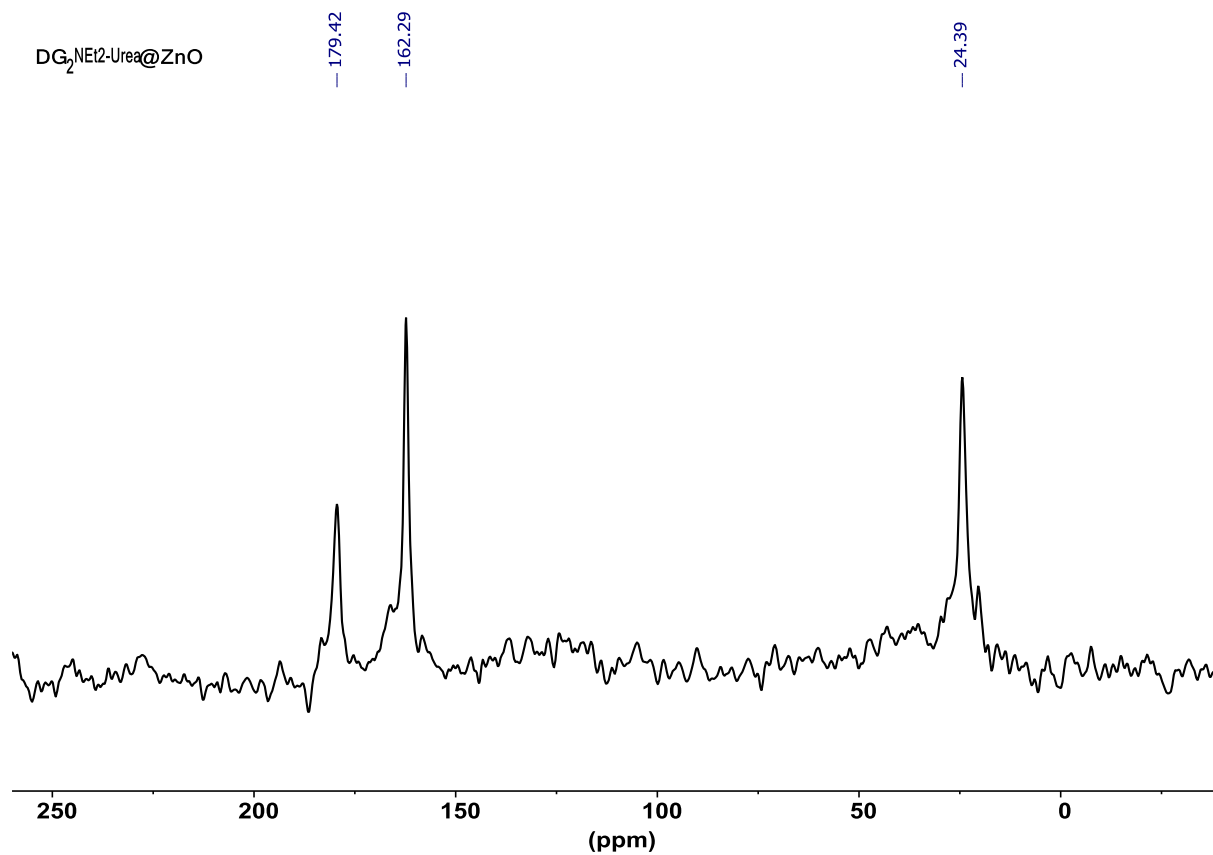

**S8. SEM analysis of  $DG_2^{-Urea}$  @ZnO**

**SEM analysis of  $DG_2^{PO3-Urea}$  @ZnO**

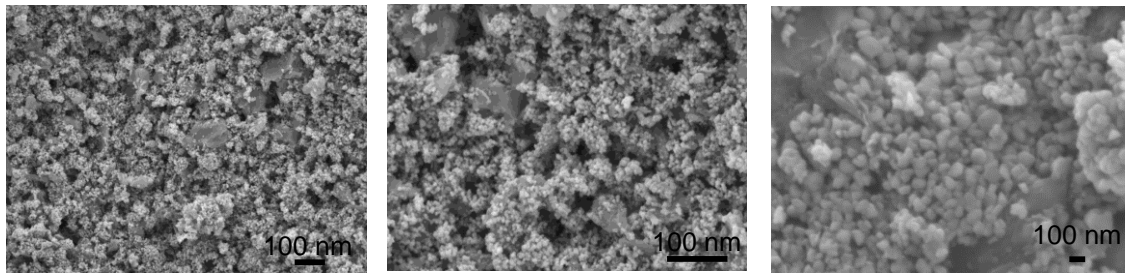

**SEM analysis of  $DG_2^{cat-Urea}$  @ZnO**

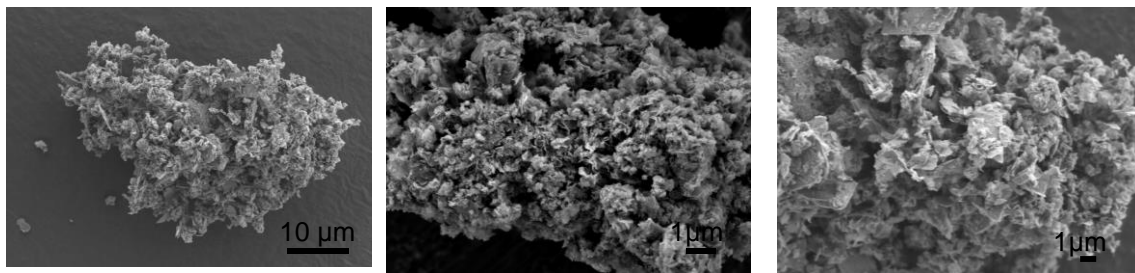

**SEM analysis of  $DG_2^{acac-Urea}$  @ZnO**

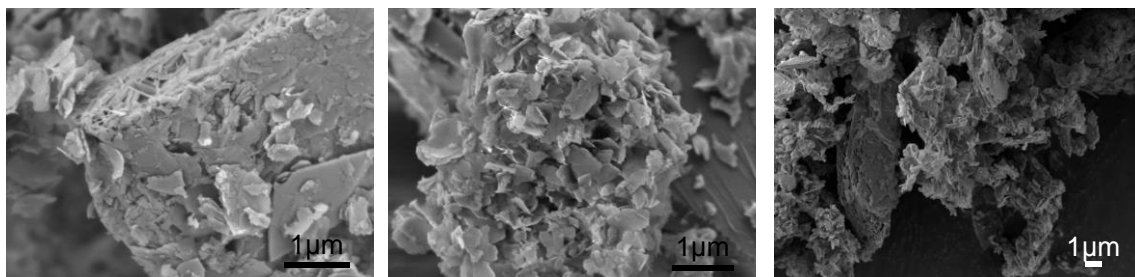

**SEM analysis of  $DG_2^{NEt2-Urea}$  @ZnO**

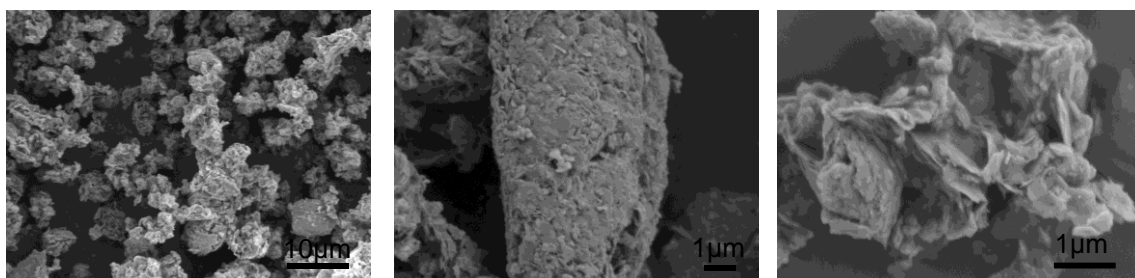

**S9. HRTEM analysis of  $DG_2^{-Urea}$  @ZnO**

**HRTEM analysis of  $DG_2^{PO_3-Urea}$  @ZnO**

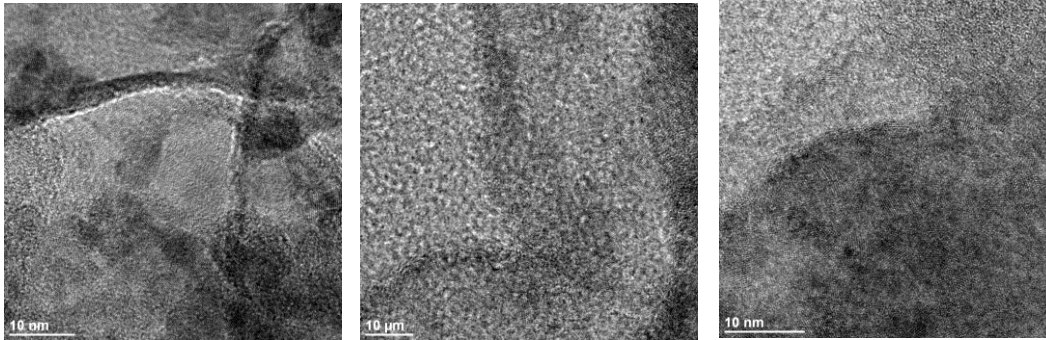

**HRTEM analysis of  $DG_2^{cat-Urea}$  @ZnO**

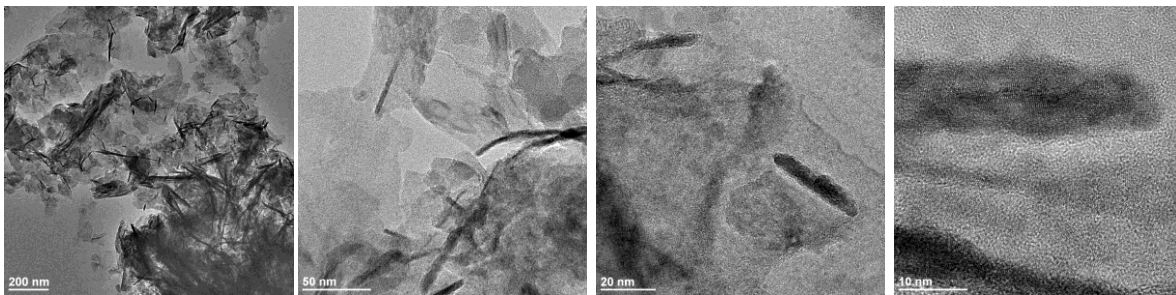

**HRTEM analysis of  $DG_2^{acac-Urea}$  @ZnO**

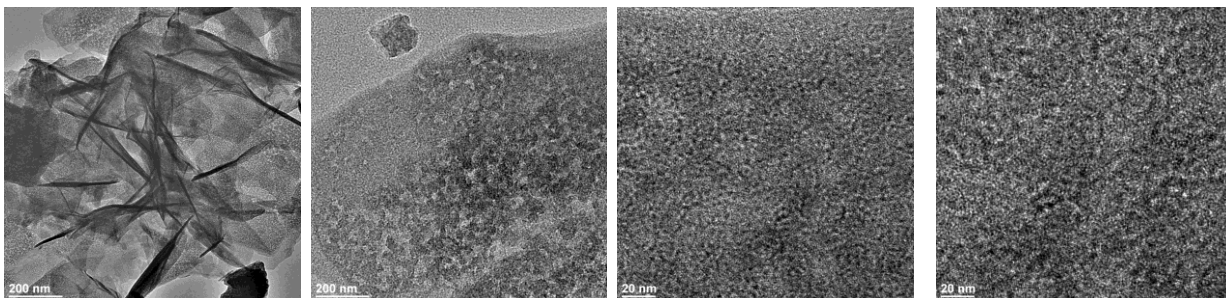

**HRTEM analysis of  $DG_2^{NEt_2-Urea}$  @ZnO**

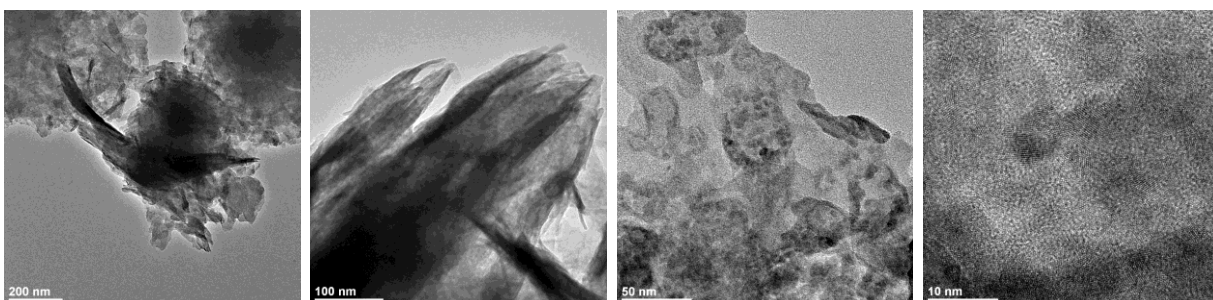

**HRTEM analysis of Urea @ZnO**

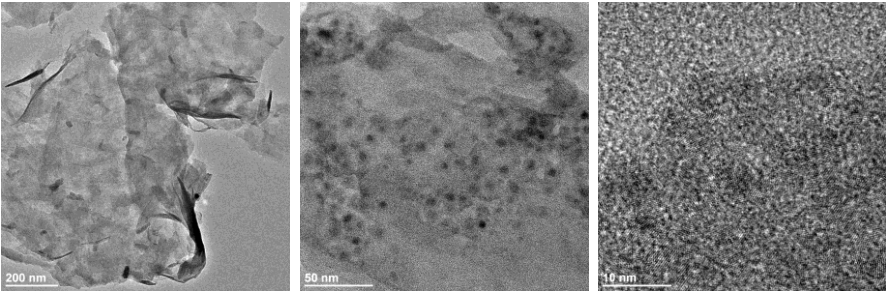



### S10. XRD analysis of $DG_2@ZnO$ and $DG_2^{-Urea}@ZnO$

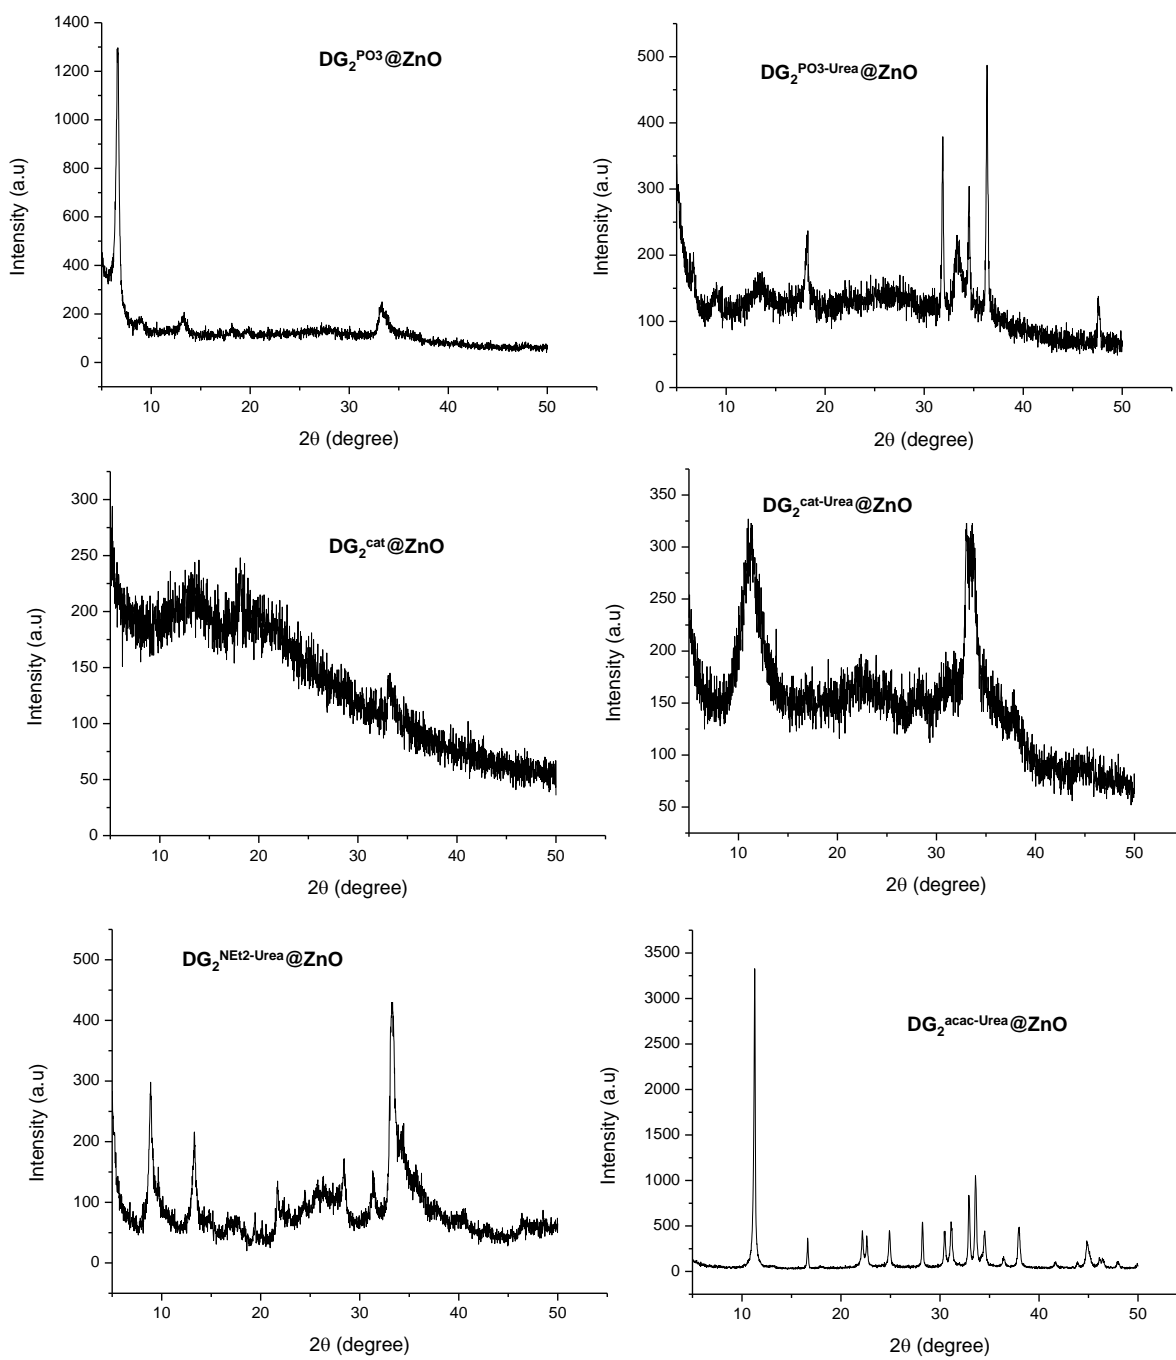

### S11. EDX analysis of $DG_2^{-Urea}@ZnO$

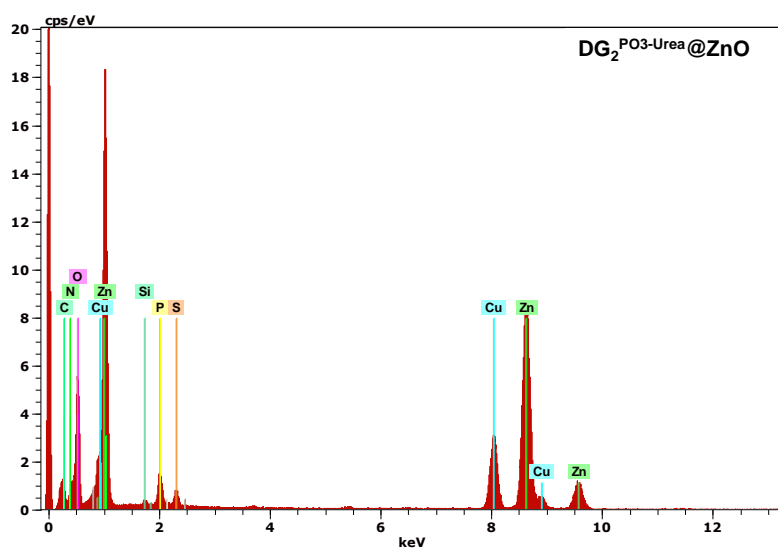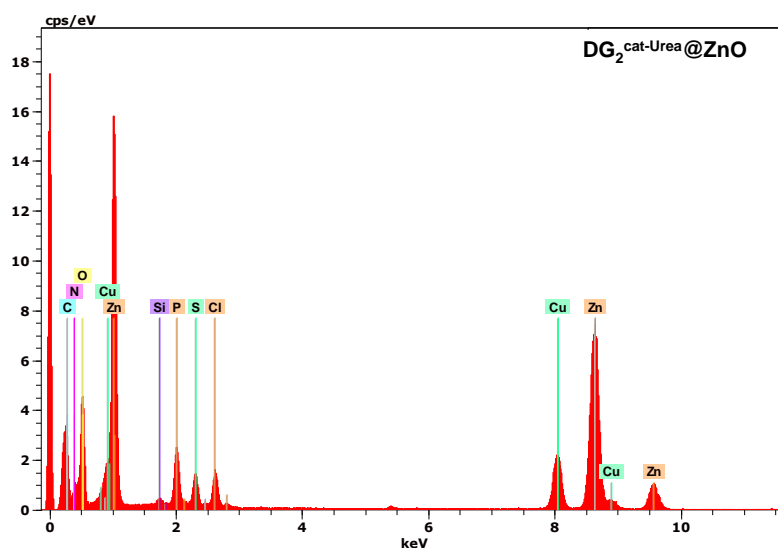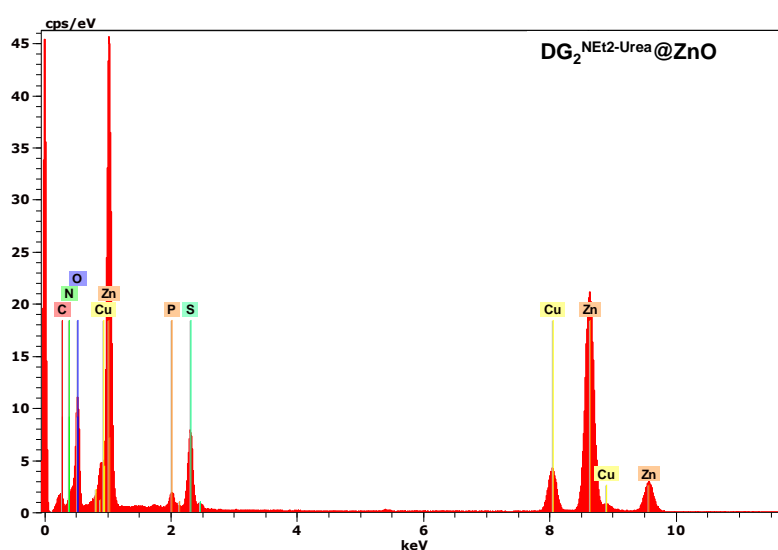

## S12. Nitrogen sorption analysis of $DG_2^{-Urea}@ZnO$

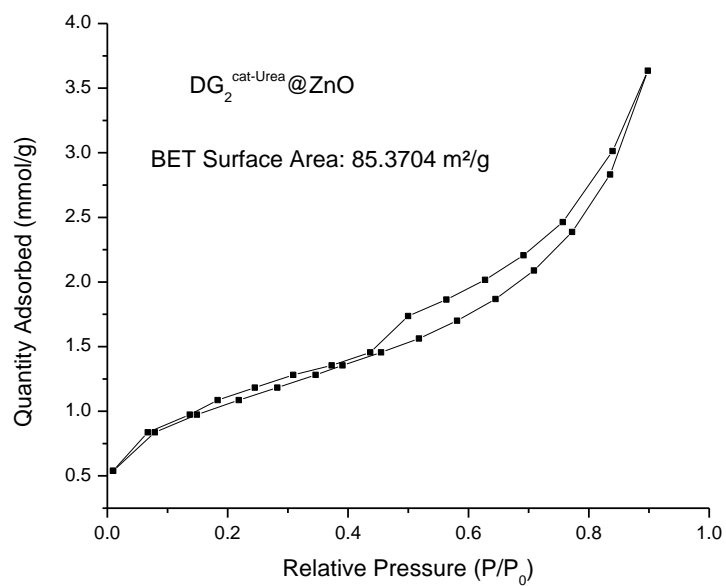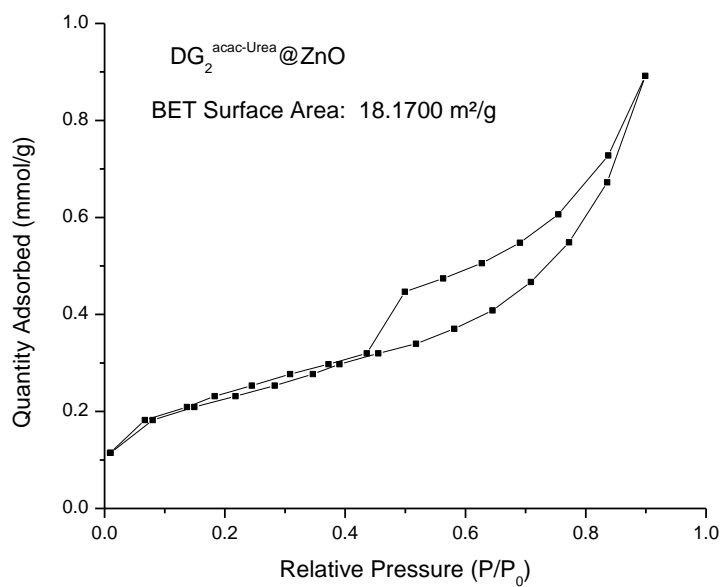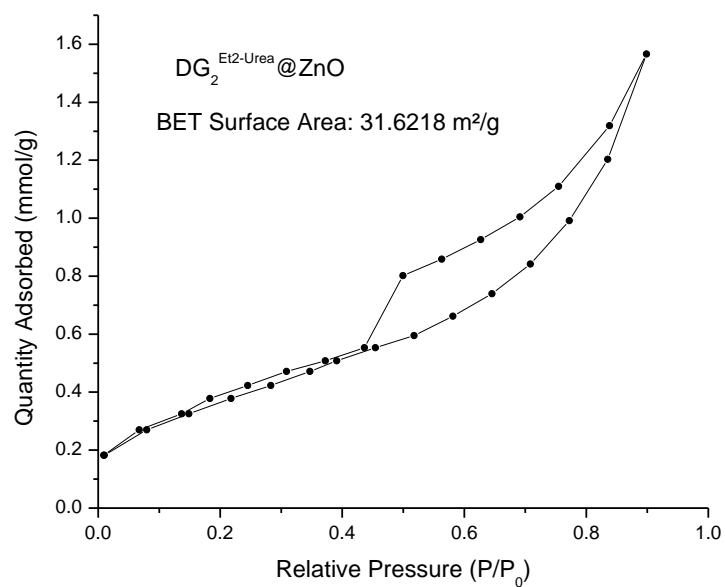

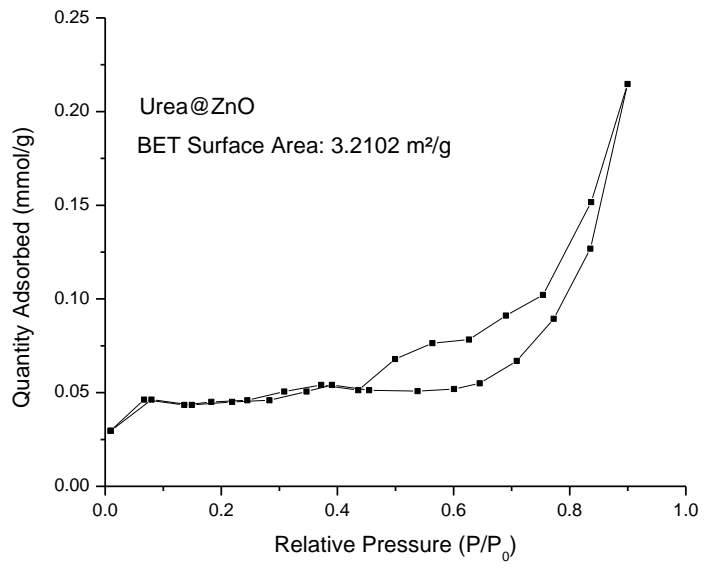

Supplement: c8nj05705b1.pdf [file c8nj05705b1.pdf]
